# Supplementary material for: SoloTE for improved analysis of transposable elements in single-cell RNA-Seq data using locus-specific expression
Source: PubMed Central journal article supplement (PMC9537157; doi:10.1038/s42003-022-04020-5), 2022-10-06
Supplement: 42003_2022_4020_MOESM2_ESM.pdf [file 42003_2022_4020_MOESM2_ESM.pdf]

## Description of Additional Supplementary Files

**File name:** Supplementary Data 1

**Description:** Marker analysis for each of the biological conditions studied, using the TE expression obtained with SoloTE or scTE.

**File name:** Supplementary Data 2

**Description:** Analysis of genes statistically associated with SoloTE locus-specific TEs, across all the biological conditions studied.
